# Supplementary material for: Nanoscale iron (oxyhydr)oxide-modified carbon nanotube filter for rapid and effective Sb(iii) removal
Source: Royal Society of Chemistry journal article supplement (doi:10.1039/c9ra02988e), 2019-01-01
Supplement: c9ra02988e1.pdf [file c9ra02988e1.pdf]

## Electronic Supplementary Information

### **Nanoscale iron (oxyhydr) oxides modified carbon nanotube filter for rapid and effective Sb(III) removal**

Yanbiao Liu,<sup>\*ab</sup> Jinyu Yao,<sup>a</sup> Fuqiang Liu,<sup>a</sup> Chensi Shen,<sup>ab</sup> Fang Li,<sup>ab</sup> Bo Yang,<sup>\*a</sup>

Manhong Huang,<sup>ab</sup> and Wolfgang Sand<sup>ac</sup>

<sup>a</sup> Textile Pollution Controlling Engineering Center of Ministry of Environmental Protection, College of Environmental Science and Engineering, Donghua University, 2999 North Renmin Road, Shanghai 201620, P. R. China. E-mail: yanbiaoliu@dhu.edu.cn; yangbo@dhu.edu.cn; Tel: +86 21 6779 8752.

<sup>b</sup> Shanghai Institute of Pollution Control and Ecological Security, 1239 Siping Road, Shanghai 200092, P. R. China.

<sup>c</sup> Institute of Biosciences, Freiberg University of Mining and Technology, Freiberg 09599, Germany

## Bed volume calculations

To quantitatively evaluate filtration capabilities, single-pass filtration was conducted under the experimental condition that a 100 or 200  $\mu\text{g/L}$  of Sb(III) solution was pumped through a iron (oxyhydr) oxides/CNT filter at pH 7, and the effluent was no longer returned, the filter bed volume was 0.113 mL, and empty bed contact time (EBCT) was 4.5 s at a fixed flow rate of 1.5 mL/min. The number of bed volume was calculated by following equation:

$$\text{Bed Volume} = \frac{1.5 \times t}{0.113}$$

Where t is filtration time (min).

## Method of DFT calculations

Density function theory calculation were performed by using the CP2K package.<sup>1</sup> PBE functional<sup>2</sup> with Grimme D3 correction<sup>3</sup> was used to describe the system. Unrestricted Kohn-Sham DFT has been used as the electronic structure method in the framework of the Gaussian and plane waves method.<sup>4, 5</sup> The Goedecker-Teter-Hutter (GTH) pseudopotentials,<sup>6,7</sup> DZVPMOLOPT-GTH basis sets<sup>4</sup> were utilized to describe the molecules. A plane-wave energy cut-off of 500 Ry has been employed. It's known that the generalized gradient functional fails to reproduce the correlated elements, and the "+U" Hubbard correction<sup>8</sup> improve the electronic descriptions. Accordingly, we adopt DFT+U method with effective U value is equal to 5 eV for Fe 3d states.<sup>9</sup>

A six atomic layer (4×4) hematite  $\text{Fe}_2\text{O}_3$  (001) surface and six-layer  $\alpha\text{FeOOH}$  (100) surface have been used in the simulation. As the  $\text{Fe}_2\text{O}_3$  is anti-ferromagnetic, we initially set the magnetic moments layer by layer as the spin polarization of neighboring layers are opposite. A vacuum of 15 Å has been added along Z-direction to decouple the interaction between images. The adsorption energies ( $E_{ad}$ ) is calculated using:

$$E_{ad} = (E_{sur} + E_{mol}) - E_{mol/sur}$$

Where the  $E_{mol/sur}$  is the total energy of the adsorbate binding with surface,  $E_{sur}$  and  $E_{mol}$  are the isolated energy of surface and molecule, respectively.

## Reference

1. J. Hutter, M. Iannuzzi, F. Schiffmann and J. VandeVondele, *Wires. Comput. Mol. Sci.*, 2014, **4**, 15-25.
2. J. Perdew, K. Burke and M. Ernzerhof, *phys. Rev. Lett.*, 1996, **77**, 3865.
3. S. Grimme, *J. comput. Chem.*, 2006, **27**, 1787–1799.
4. J. VandeVondele and J. Hutter, *J. chem. phys.*, 2007, **127**, 114105,
5. J. VandeVondele, M. Krack, F. Mohamed, M. Parrinello, T. Chassaing, and J. Hutter, *Comput. Phys. Commun.*, 2005, **167**, 103–128.
6. S. Goedecker, M. Teter, and J. Hutter, *Phys. Rev. B*, 1996, **54**, 1703.
7. C. Hartwigsen, S. Goedecker, and J. Hutter, *Phys. Rev. B*, 1998, **58**, 3641.
8. S. Dudarev, G. Botton, S. Savrasov, C. Humphreys, and A. Sutton, *Phys. Rev. B*, 1998, **57**, 1505.
9. L. Wang, T. Maxisch, and G. Ceder, *Phys. Rev. B*, 2006, **73**, 195107.

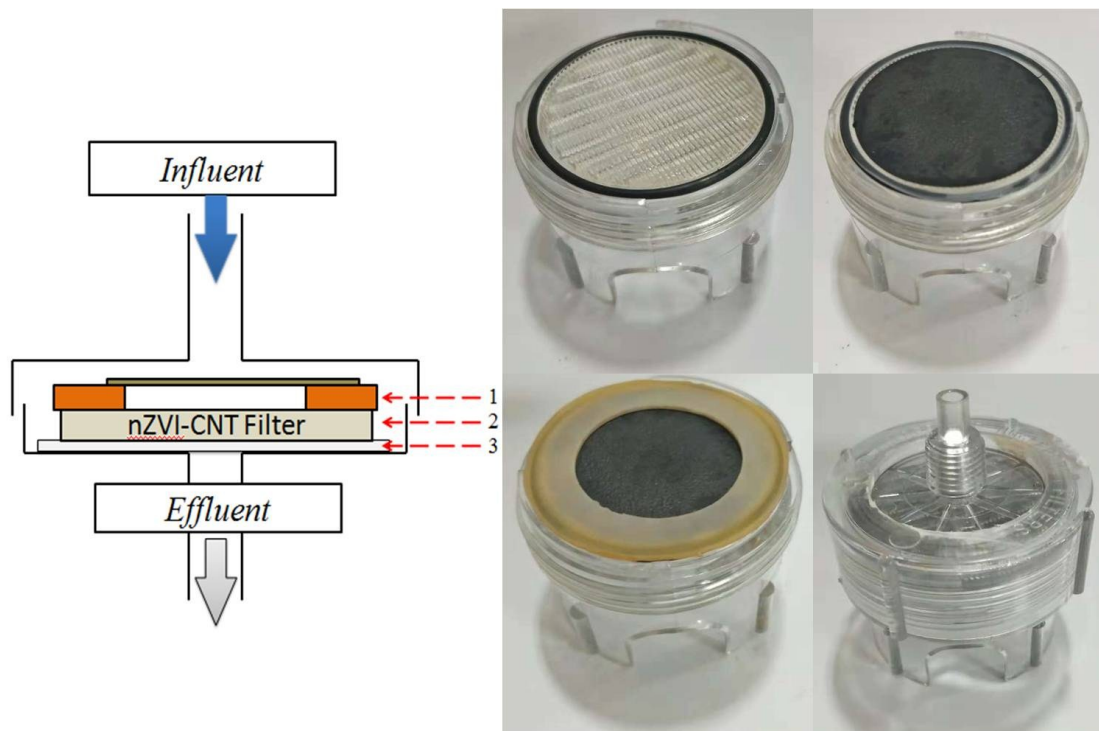

**Fig. S1** Schematics of filtration apparatus: (1) a ring-shaped silicone rubber separator and seal; (2) a iron (oxyhydr) oxides/CNT Filter; (3) a PTFE membrane support.

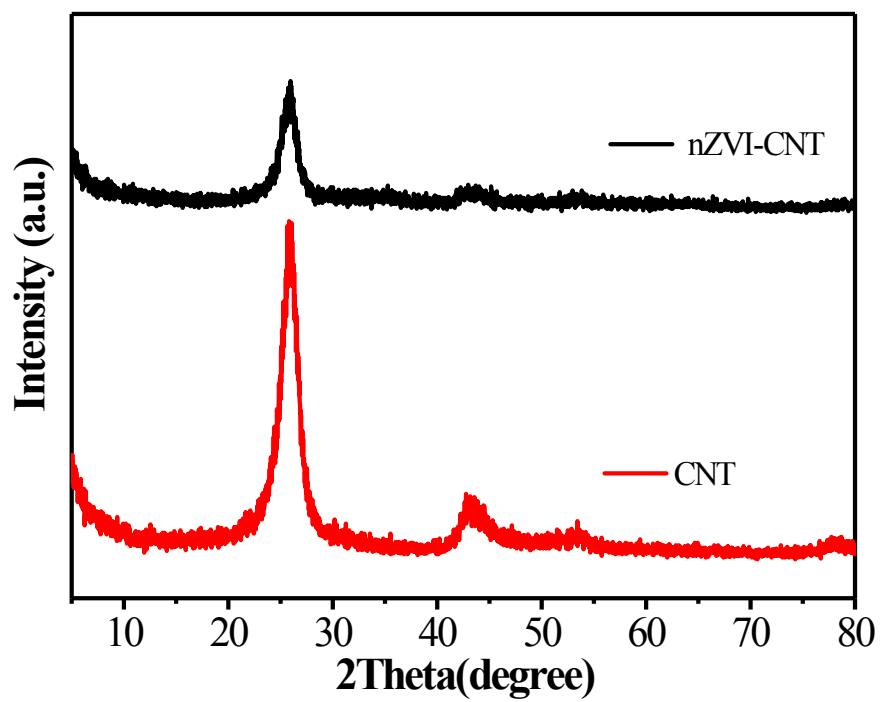

**Fig. S2** XRD patterns of the CNT and iron (oxyhydr) oxides/CNT.

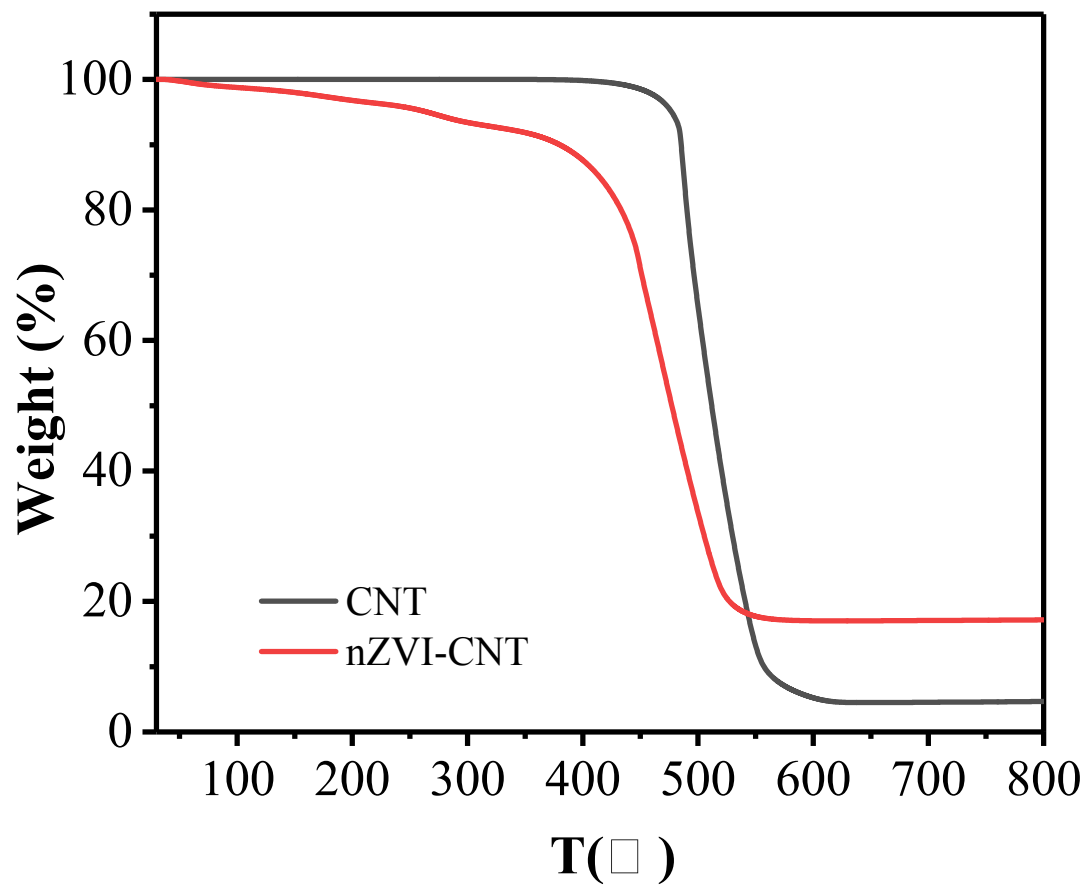

**Fig. S3** TGA image of the CNT and iron (oxyhydr) oxides/CNT.

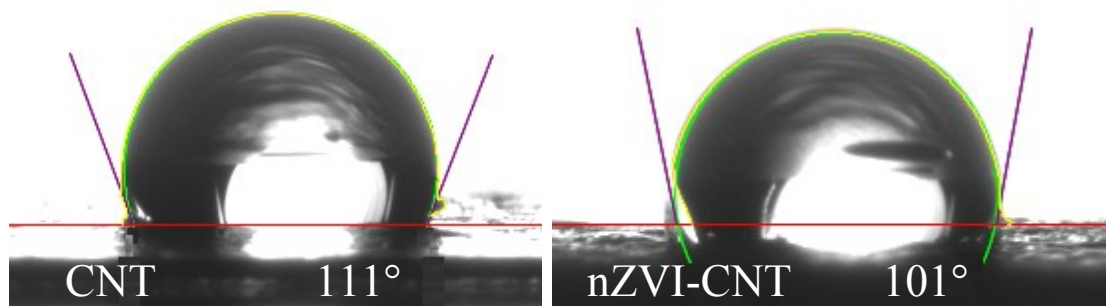

**Fig. S4** CNT and iron (oxyhydr) oxides/CNT network contact angle measurement after 30s. Both CNT network and iron (oxyhydr) oxides/CNT network were hydrophobic with contact angle of 111° and 101° respectively.

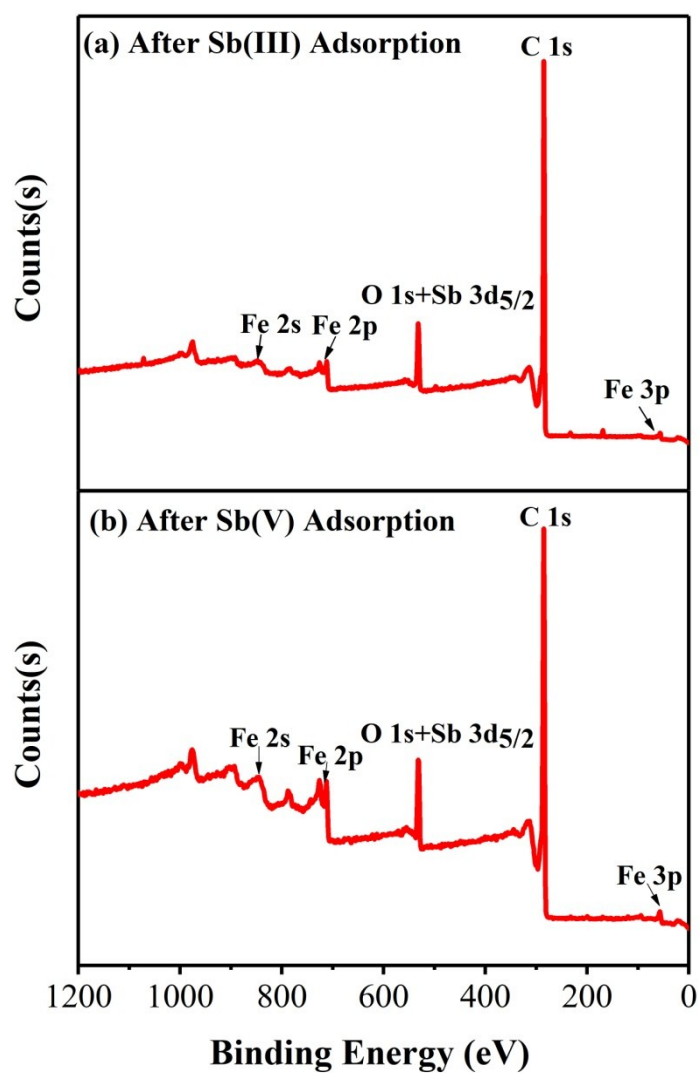

**Fig. S5** XPS Survey scan for iron (oxyhydr) oxides/CNT filter (a) After Sb(III) adsorption and (b) after Sb(V) adsorption.



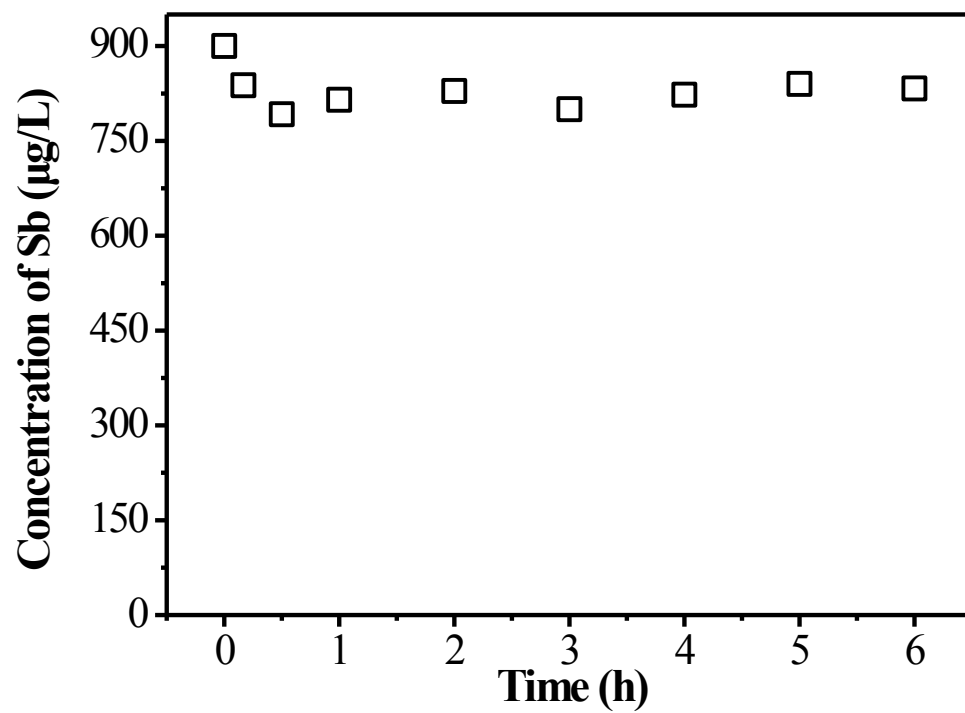

**Fig. S6** Sb(III) sorption on the pure CNT filter in recirculation mode at a flow rate of 3 mL/min.

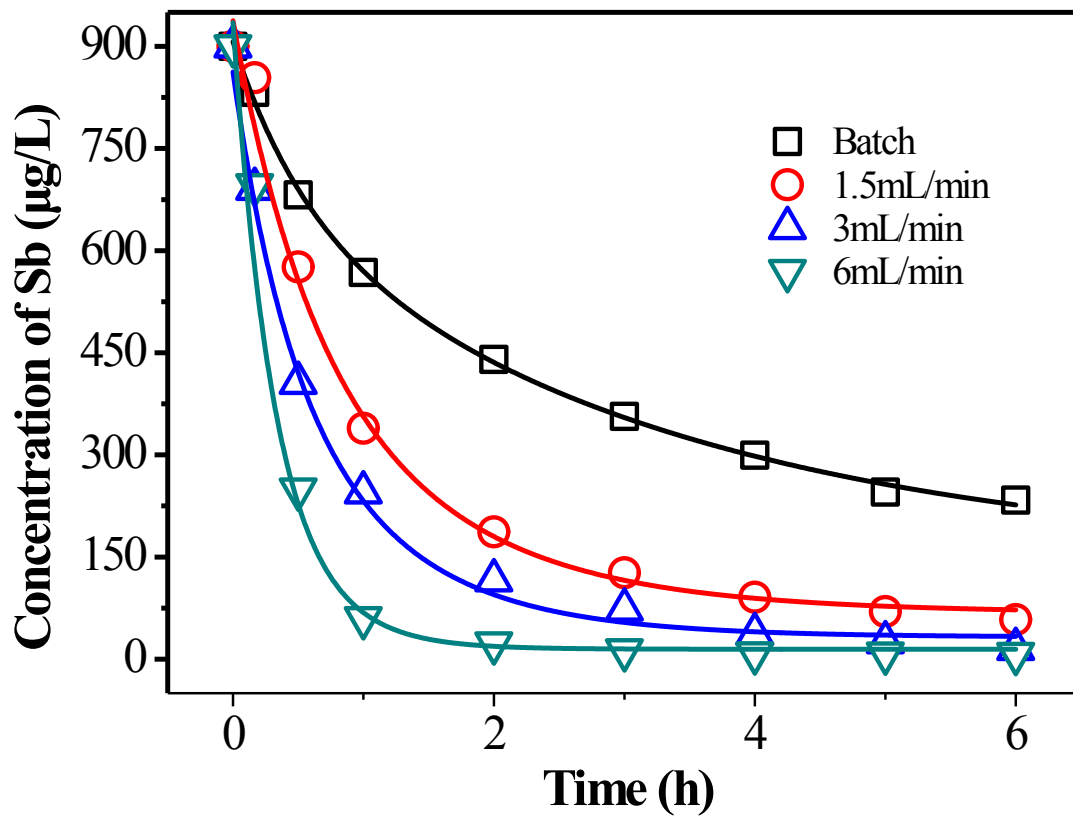

**Fig. S7** The change in concentration of Sb with time when 100mL 900µg/L Sb solution was reacted with a iron (oxyhydr) oxides/CNT filter, and experiment was conducted in batch mode and recirculation mode (flow rate of 1.5mL/min, 3mL/min and 6 mL/min).

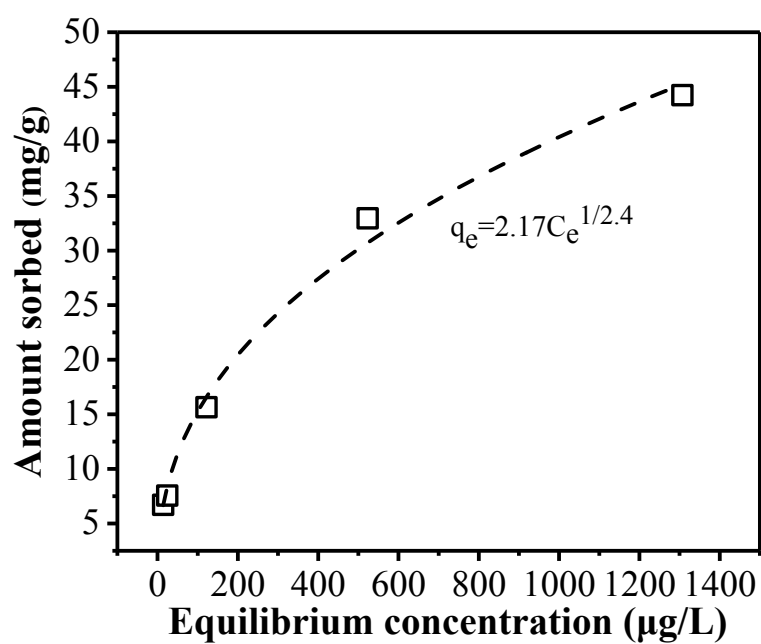

**Fig. S8** Iron (oxyhydr) oxides/CNT Sb sorption isotherms. Experiments were conducted in recirculation mode for 12 h using a 100 mL reservoir, flow rate was 3ml/min. Experimental data are fittings to the Freundlich isotherm model, and correlation coefficients >99%.

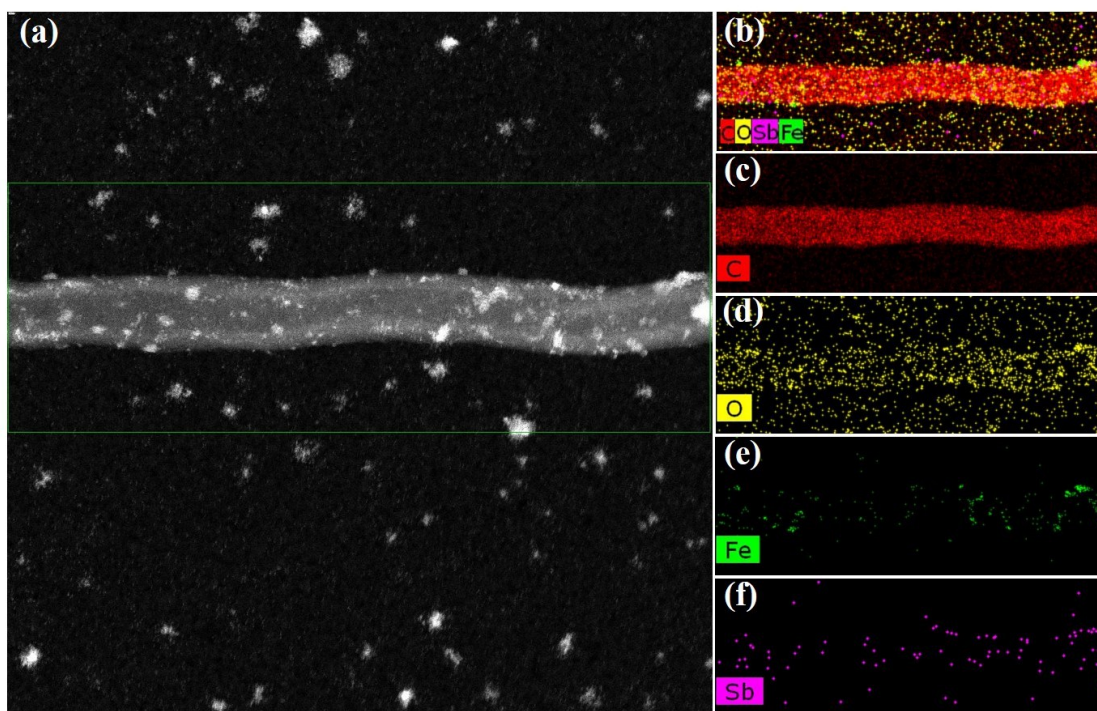

**Fig. S9** HAADF image (a); EDS mapping (b) of Sb-loaded iron (oxyhydr) oxides/CNT; and the corresponding EDS elemental C(c), O(d), Fe(e) and Sb(f) maps.

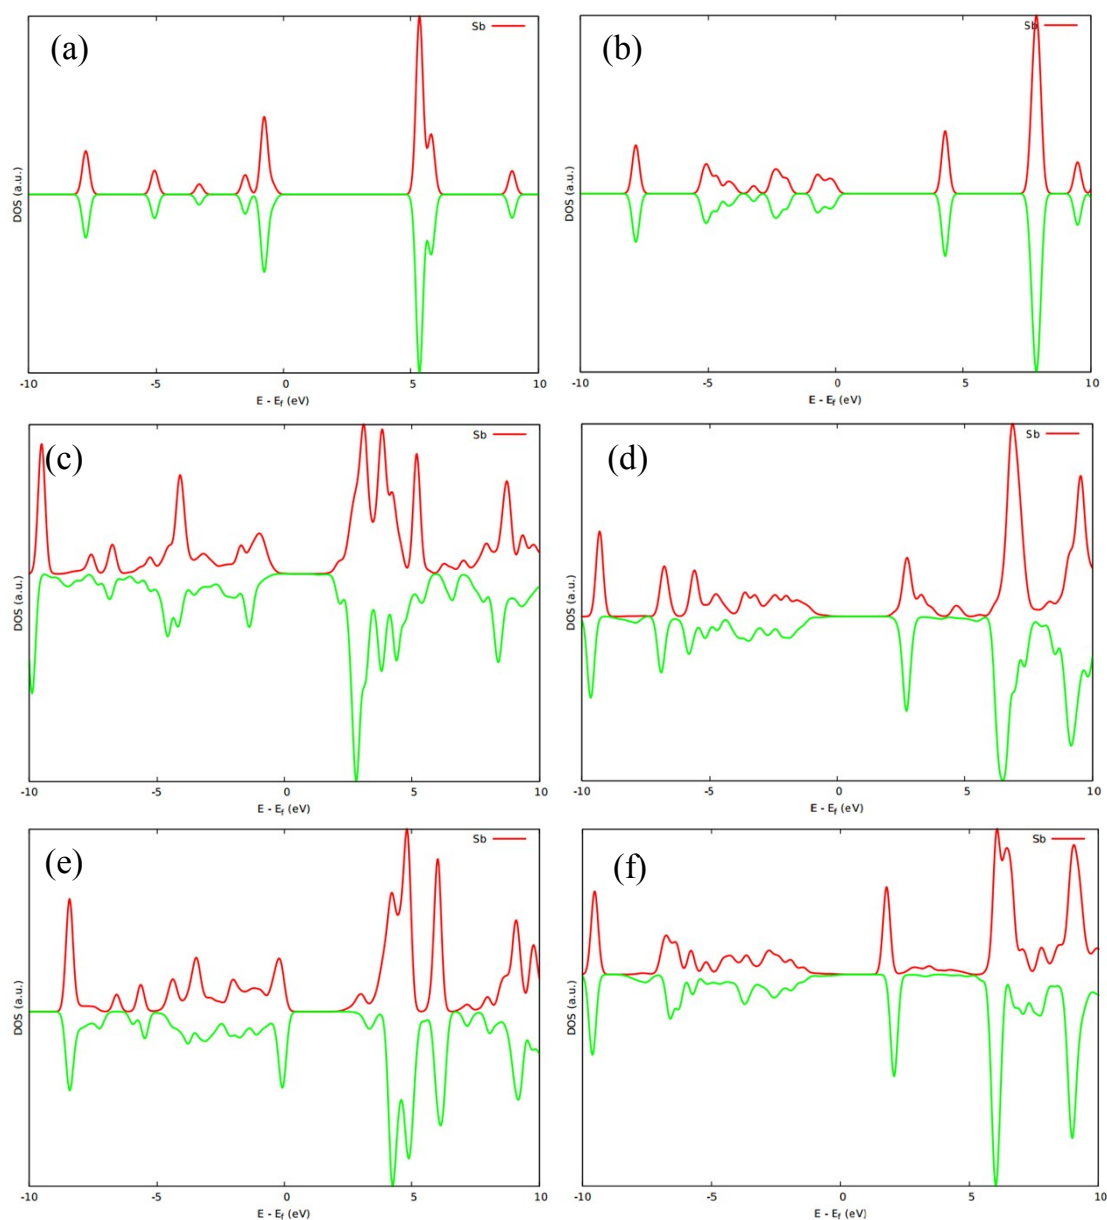

**Fig. S10** The projected density of state for Sb adsorbed on FeOOH and Fe<sub>2</sub>O<sub>3</sub> surface. Dos of isolated Sb(V) (a), isolated Sb(III)(b), Sb(III) on FeOOH(c), Sb(V) on FeOOH(d), Sb(III) on Fe<sub>2</sub>O<sub>3</sub>(e), Sb(V) on Fe<sub>2</sub>O<sub>3</sub>(f).
